# Supplementary material
Source: Springer Nature journal article supplement (https://www.springermedizin.de/resource/supplementary/13054_2012_941_MOESM7_ESM.pdf/9709290)

# Validation cohort clustering

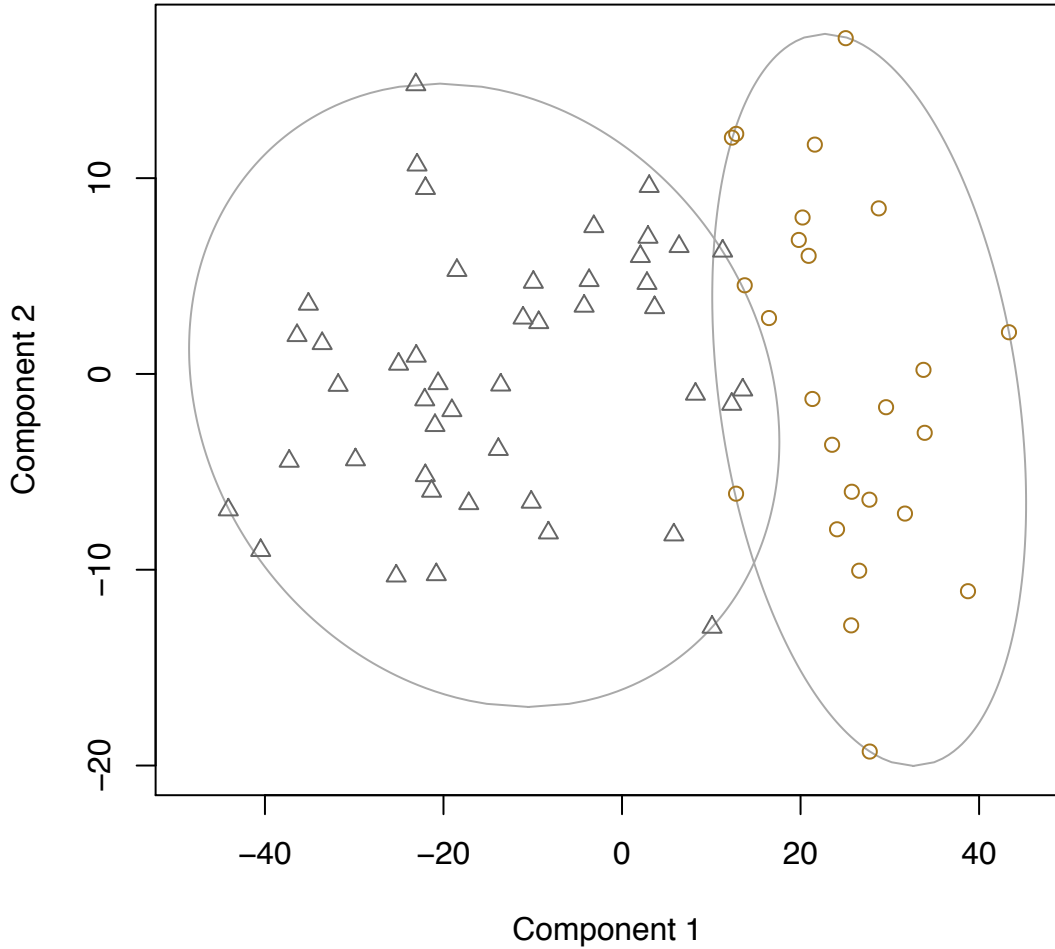

Supplement: MOESM7 [file 9709290]
